# Supplementary material
Source: PubMed Central journal article supplement (PMC6853405)
Supplement: jcsm.15.11.1571SD1.pdf [file jcsm.15.11.1571SD1.pdf]

Table S1. Multivariable model of hazard ratios of sleep apnea with time-dependent survival analysis

|                     | Hypertensive patients                              |                                                         | Non-hypertensive patients                         |                                                        |
|---------------------|----------------------------------------------------|---------------------------------------------------------|---------------------------------------------------|--------------------------------------------------------|
|                     | $\alpha$ 1-adrenergic antagonist user<br>(N=12733) | Non- $\alpha$ 1-adrenergic antagonist user<br>(N=12733) | $\alpha$ 1-adrenergic antagonist user<br>(N=9465) | Non- $\alpha$ 1-adrenergic antagonist user<br>(N=9465) |
|                     | n (%)                                              | n (%)                                                   | n (%)                                             | n (%)                                                  |
| Sleep apnea         | 233 (1.83)                                         | 121 (0.95)                                              | 130 (1.37)                                        | 50 (0.53)                                              |
| Crude HR (95%CI)    | 2.10 (1.69-2.62)*                                  | 1                                                       | 2.90 (2.06-4.02)*                                 | 1                                                      |
| Adjusted HR (95%CI) | 2.09 (1.59-2.76)*                                  | 1                                                       | 2.49 (1.71-3.64)*                                 | 1                                                      |
| Severe sleep apnea  | 97 (0.76)                                          | 41 (0.32)                                               | 35 (0.37)                                         | 9 (0.10)                                               |
| Crude HR (95%CI)    | 2.58 (1.79-3.71)*                                  | 1                                                       | 4.31 (2.07-8.96)*                                 | 1                                                      |
| Adjusted HR (95%CI) | 4.30 (2.71-6.83)*                                  | 1                                                       | 3.35 (1.57-7.13)*                                 | 1                                                      |

Adjusted HR: Time-dependent Cox regression; Time-dependent covariates: each consecutive year of follow-up was classified as years with and without  $\alpha$ 1-adrenergic antagonists; Fixed covariates: age, geographic location, enrollee category, income, urbanization level, comorbidities.

\* P value <0.05; † Using a stratified Cox regression model

Table S2. Multivariable model of hazard ratios of sleep apnea with time-dependent survival analysis and using non-hypertensive non- $\alpha$ 1-adrenergic antagonist use cohort as reference

|                     | Hypertensive patients                             |                                                        | Non-hypertensive patients                         |                                                        |
|---------------------|---------------------------------------------------|--------------------------------------------------------|---------------------------------------------------|--------------------------------------------------------|
|                     | $\alpha$ 1-adrenergic antagonist user<br>(N=8791) | Non- $\alpha$ 1-adrenergic antagonist user<br>(N=8791) | $\alpha$ 1-adrenergic antagonist user<br>(N=8791) | Non- $\alpha$ 1-adrenergic antagonist user<br>(N=8791) |
|                     | n (%)                                             | n (%)                                                  | n (%)                                             | n (%)                                                  |
| Sleep apnea         | 179 (2.04)                                        | 97 (1.10)                                              | 121 (1.38)                                        | 44 (0.50)                                              |
| Crude HR (95%CI)    | 4.50 (3.24-6.26)*                                 | 2.26 (1.59-3.23)*                                      | 3.08 (2.18-4.35)*                                 | 1                                                      |
| Adjusted HR (95%CI) | 2.24 (1.65-3.04)*                                 | 1.51 (1.17-1.95)*                                      | 1.76 (1.26-2.46)*                                 | 1                                                      |
| Severe sleep apnea  | 70 (0.80)                                         | 36 (0.41)                                              | 32 (0.36)                                         | 7 (0.08)                                               |
| Crude HR (95%CI)    | 11.02 (5.07-23.97)*                               | 5.27 (2.35-11.85)*                                     | 5.11 (2.26-11.58)*                                | 1                                                      |
| Adjusted HR (95%CI) | 5.50 (3.03-9.97)*                                 | 2.90 (1.68-5.00)*                                      | 3.55 (1.84-6.84)*                                 | 1                                                      |

Adjusted HR: Time-dependent Cox regression; Time-dependent covariates: each consecutive year of follow-up was classified as years with and without  $\alpha$ 1-adrenergic antagonists; Fixed covariates: age, geographic location, enrollee category, income, urbanization level, comorbidities.

\* P value <0.05; † Using a stratified Cox regression model

Table S3. Multivariable model of hazard ratios of sleep apnea with high and low doses of  $\alpha$ 1-adrenergic antagonist use

|                    | Hypertensive patients |                    |                    | Non-hypertensive patients |                    |                     |
|--------------------|-----------------------|--------------------|--------------------|---------------------------|--------------------|---------------------|
|                    | 0<br>(N=12733)        | Low<br>(N=9603)    | High<br>(N=3130)   | 0<br>(N=9465)             | Low<br>(N=7782)    | High<br>(N=1683)    |
| Sleep apnea        | 121 (0.95)            | 166 (1.73)         | 67 (2.14)          | 50 (0.53)                 | 94 (1.21)          | 36 (2.14)           |
| Crude HR           | 1                     | 1.96 (1.55-2.48)*  | 2.57 (1.91-3.47)*  | 1                         | 2.55 (1.81-3.60)*  | 4.48 (2.92-6.88)*   |
| Adjusted HR1       | 1                     | 1.96 (1.52-2.52)*  | 2.56 (1.69-3.86)*  | 1                         | 2.35 (1.63-3.39)*  | 3.26 (1.76-6.05)*   |
| Adjusted HR2       | 1                     | 1.97 (1.51-2.57)*† | 2.54 (1.67-3.89)*† | 1                         | 1.79 (1.19-2.68)*† | 2.53 (1.25-5.16)*†  |
| CRR                | 1                     | 1.96 (1.50-2.56)*† | 2.57 (1.67-3.96)*† | 1                         | 1.84 (1.25-2.70)*† | 2.89 (1.51-5.53)*†  |
| Severe sleep apnea | 41 (0.32)             | 71 (0.74)          | 26 (0.83)          | 9 (0.10)                  | 24 (0.31)          | 11 (0.65)           |
| Crude HR           | 1                     | 2.47 (1.68-3.62)*  | 2.94 (1.80-4.81)*  | 1                         | 3.60 (1.67-7.75)*  | 7.54 (3.12-18.20)*  |
| Adjusted HR1       | 1                     | 2.39 (1.58-3.61)*  | 2.68 (1.39-5.18)*  | 1                         | 3.51 (1.57-7.84)*  | 6.79 (1.84-25.00)*  |
| Adjusted HR2       | 1                     | 2.10 (1.37-3.24)*† | 2.17 (1.10-4.25)*† | 1                         | 2.81 (1.12-7.06)*† | 5.27 (1.14-24.39)*† |
| CRR                | 1                     | 2.09 (1.38-3.17)*† | 2.20 (1.14-4.24)*† | 1                         | 2.93 (1.29-6.65)*† | 6.15 (1.47-25.75)*† |

\* P value <0.05; † Using a stratified Cox regression model

**Figure S1.** Sensitivity analysis with the addition of an unmeasured residual confounding factor. The estimates trend of  $\alpha$ 1-adrenergic-antagonist use in the hypertensive group, and the hazard ratio of sleep apnea, in a multivariable-adjusted Cox regression model.

**Figure S2.** Sensitivity analysis with the addition of an unmeasured residual confounding factor. The estimates trend of  $\alpha$ 1-adrenergic antagonist use in the non-hypertensive group, and the hazard ratio of sleep apnea, in a multivariable-adjusted Cox regression model.

**Figure S3.** Sensitivity analysis with the addition of an unmeasured residual confounding factor. The estimates trend of  $\alpha$ 1-adrenergic antagonist use in the hypertensive group, and the hazard ratio of severe sleep apnea, in a multivariable-adjusted Cox regression model.

**Figure S4.** Sensitivity analysis with the addition of an unmeasured residual confounding factor. The estimates trend of  $\alpha$ 1-adrenergic antagonist use in the non-hypertensive group, and hazard ratio of severe sleep apnea, in a multivariable-adjusted Cox regression model.

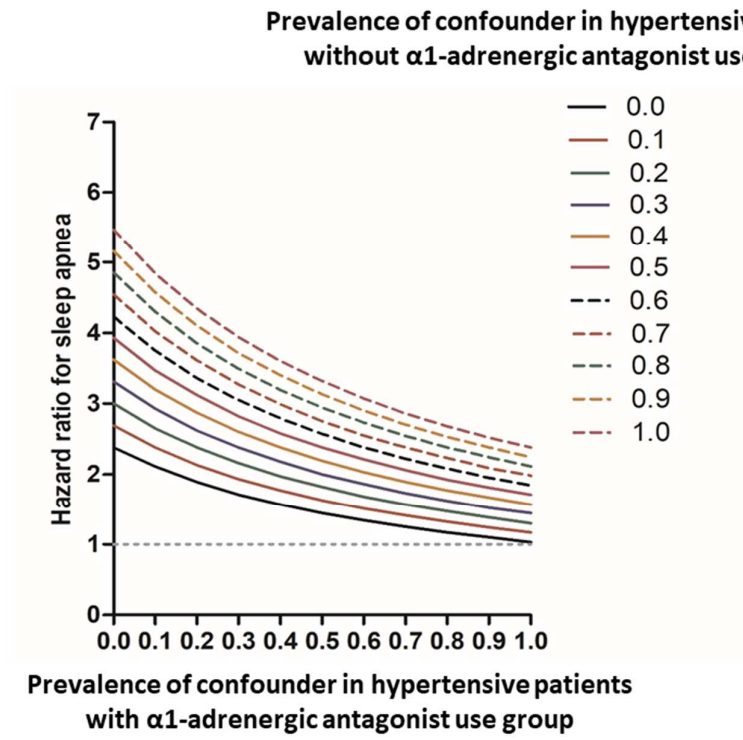

Figure S1.

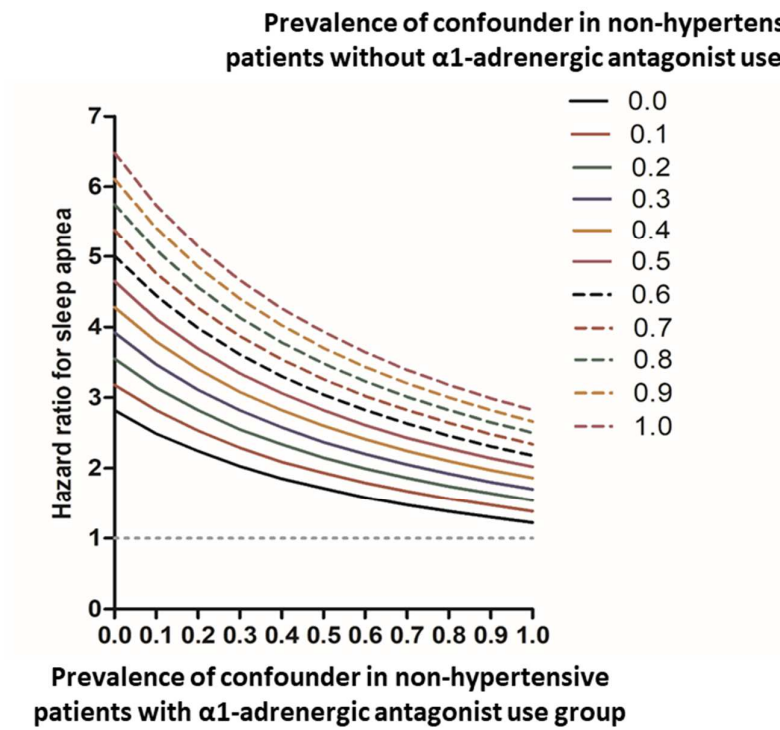

Figure S2.

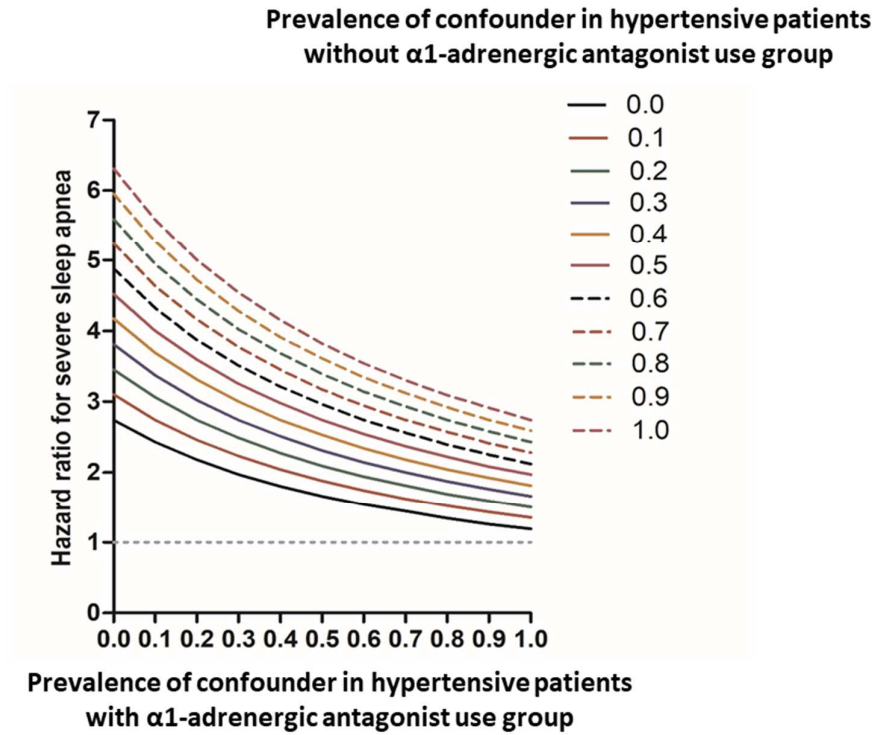

Figure S3.

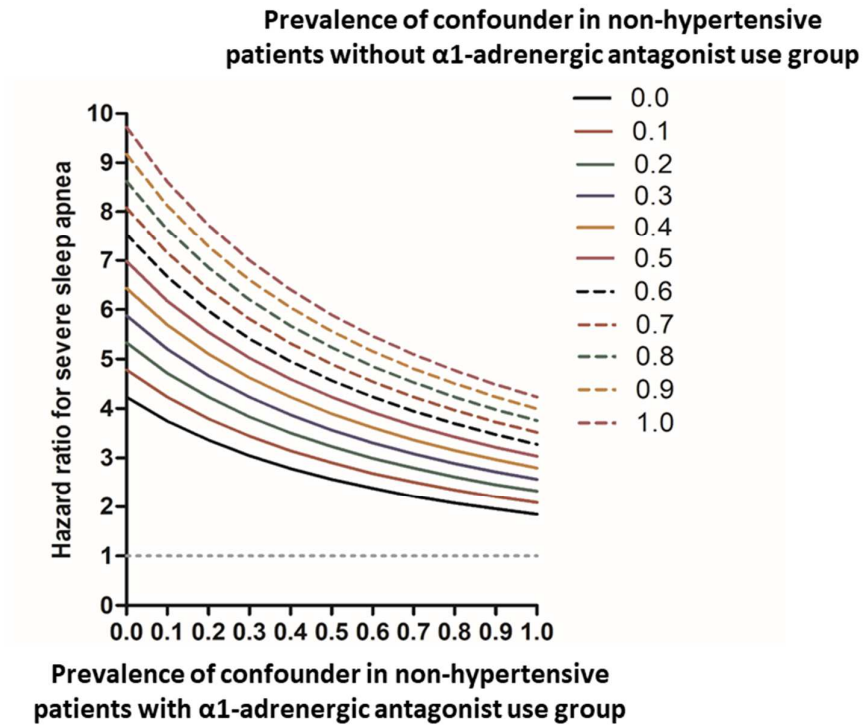

Figure S4.
